1 Epidemiology, Microbiology and Therapeutic Consequences of Chronic Osteomyelitis in  
2 Northern China: A Retrospective Analysis of 255 Patients

3

4 Xianzhi Ma, <sup>a</sup>Shengshou Han, <sup>a</sup>Jun Ma, <sup>a</sup>Xiaotao Chen, <sup>a</sup>Wenbin Bai, <sup>a</sup>Wenqi Yan, <sup>a</sup>Kai  
5 Wang <sup>a</sup>#

6 <sup>a</sup>Trauma Orthopedic Department, Qinghai Provincial People's Hospital, Xining, Qinghai,  
7 China

8

9 Running Head: Chronic Osteomyelitis in Northern China.

10 #Address correspondence to Kai Wang, wangsci123@sina.com

11 X.M. and S.H. contributed equally to this work.

1     **Epidemiology, microbiology and therapeutic consequences of chronic osteomyelitis in**  
2                                   **northern China: A retrospective analysis of 255 Patients**

3     **Xianzhi Ma<sup>1</sup> Shengshou Han<sup>1</sup> Jun Ma<sup>2</sup> Xiaotao Chen<sup>3</sup> Wenbin Bai<sup>3</sup> Wenqi**  
4     **Yan<sup>3</sup> Kai Wang<sup>2\*</sup>**

5     **Abstract**

6     The study aimed to explore the epidemiology and clinical characteristics of chronic  
7     osteomyelitis observed in a northern China hospital. Clinical data of 255 patients with  
8     chronic osteomyelitis from January 2007 to January 2014 were collected and analyzed,  
9     including general information, disease data, treatment and follow-up data. Chronic  
10    osteomyelitis is more common in males and in the age group from 41-50 years of age.  
11    Common infection sites are the femur, tibiofibular, and hip joint. More g+ than g- bacterial  
12    infections were observed, with *S. aureus* the most commonly observed pathogenic organism.  
13    The positive detection rate from debridement bacterial culture is 75.6%. The detection rate  
14    when five samples are sent for bacterial culture is 90.6%, with pathogenic bacteria identified  
15    in 82.8% of cases. The two-stage debridement method (87.0%) has higher first curative rate  
16    than the one-stage debridement method (71.2%). To improve detection rate using bacterial  
17    culture, at least five samples are recommended. Treatment of chronic osteomyelitis with  
18    two-stage debridement, plus antibiotic-loaded polymethylmethacrylate (PMMA) beads  
19    provided good clinical results in this study and is therefore recommended.

20

21 Chronic osteomyelitis is a common clinical disease and a challenging disorder, characterized  
22 by its long disease course, difficult early diagnosis and high disability rate. The clinical  
23 characteristics of chronic osteomyelitis are varied, and may be affected by geography, time,  
24 and pathogenetic differences. Geographically, developing countries have a higher incidence  
25 of the disease than developed ones, likely caused by differences in economic foundation,  
26 lifestyle and healthcare level [1-2]. Over time, a shift has occurred from predominately  
27 hematogenous osteomyelitis several decades ago, to a predominance of chronic osteomyelitis  
28 that results from trauma, implant infection, and diabetes [3-6].

29 In recent years, the number of patients with open wounds and multiple fractures from road  
30 and industrial accidents has sharply increased in China, as the Chinese economy undergoes  
31 rapid development. Multiple injuries are difficult to treat and frequently lead to infection;  
32 thus, treatment exerts great pressures on patients, both economically and psychologically. It  
33 also poses great challenges for orthopedists [7]. Wang [8] and Jiang et al. [9] provide recent  
34 data on the epidemiology of chronic osteomyelitis in southwest and southern China, which  
35 can be used by local government policy-makers and by clinicians. However, China is a  
36 country of great diversity in its population, climate and culture. Currently, data and relevant  
37 research are lacking for northern China on the epidemiology of chronic osteomyelitis. To  
38 address this, we conduct an epidemiological statistical analysis on 255 patients at a  
39 prominent hospital and explore the clinical characteristics of chronic osteomyelitis in

40 northern China.

## 41 **Methods**

42 A retrospective analysis was completed on 255 cases of patients with chronic osteomyelitis  
43 seen in the trauma orthopedic department at our hospital from January 2007 to January 2014.

44 Patient inclusion criteria were:

- 45 (1) osteomyelitis diagnosis;
- 46 (2) local swelling and bone pain on examination;
- 47 (3) draining fistula present;
- 48 (4) imaging procedures completed;
- 49 (5) microbiological and histopathological examinations completed;
- 50 (6) biochemical examinations completed.

51 Exclusion criteria were:

- 52 (1) acute osteomyelitis (less than 2 weeks);
- 53 (2) no surgical treatment done;
- 54 (3) osteomyelitis site in the spine, pelvis or skull;
- 55 (4) complete data and examinations not available;
- 56 (5) patient had diabetic foot infection and was not treated in our department.

57 All data were obtained from the case management system in the medical record room of the  
58 hospital prior to this research.

59 The following data were collected:

60 1. Demographic information: age and gender;

61 2. Disease data: infection site, Cierny-Mader classification, laboratory examination results

62 (including erythrocyte sedimentation rate (ESR), C-Reactive protein (CRP) and white blood

63 cell (WBC)), and bacterial culture results (respectively from debridement and sinus tract);

64 3. Treatment method: two-stage debridement and one-stage debridement;

65 4. Follow-up data were obtained by searching medical records and by telephone. All patients

66 were successfully followed-up 9-93 months (46.2 month in average) after the operation.

### 67 ***Bacterial Culture and Identifying Pathogenic Bacteria***

68 Different samples were collected during debridement and in sinus tract and sent for bacterial

69 culture. The results are essential to identify pathogenic bacterial.

70 If the same bacteria type was detected in at least two different samples, it was identified as a

71 pathogenic bacterium. Based on this principle, we examined the number of samples that

72 tested positive with the number of samples analyzed, and the differences between them in

73 identifying the pathogenic bacteria.

74 Bacterial cultures from the sinus tract samples can be an additional aid when examining

75 chronic osteomyelitis and its result can serve as a reference for diagnosis and treatment.

76 Samples from 58 patients with sinus tracts were sent for bacterial culture.

77 The coincidence rate between sinus tract positive result and identified pathogenic bacterial

78 were examined, to assess its ability in identifying pathogenic bacteria.

### 79 ***Treatment Methods***

80 Two treatments were used in the study.

81 *Two-stage Debridement:* Two-stage debridement + Antibiotic-loaded

82 polymethylmethacrylate (PMMA) spacers ± External fixation

83 Step 1: Debridement and implantation of antibiotic-loaded PMMA. At the first stage of

84 debridement, the antibiotics vancomycin and imipenem are used locally.

85 Step 2: During the one-week clinical observation, X-rays and CT scans are repeated, along

86 with laboratory tests of CRP and ESR levels and reexamined while awaiting pathology

87 results from the debridement bacterial culture. Patients received intravenous antibiotics

88 during this time.

89 Step 3: Debridement was performed again after one week. The original

90 antibiotic-impregnated cement beads were removed. Based on the pathogenic bacteria

91 detected and its sensitivity test, appropriate antibiotic PMMA beads were implanted.

92 *One-stage debridement:* Debridement + Antibiotic-loaded PMMA spacers ± external fixation

93 This treatment included only step 1 of the two-stage treatment above.

94 In the current study, we compared and analyzed their clinical effects and prognosis of each

95 treatment.

96 ***Follow-up:*** In a follow-up session, clinical cure was assessed based on the following

97 information: whether clinical symptoms of infection had disappeared, including local redness,  
98 swelling, heat, pain, abscess, and sinus tract; whether laboratory examination results no  
99 longer had indicators of infection, including WBC count, ESR, and CRP; and, whether  
100 progressive periosteum thickening or osteolysis was no longer present on a recent X-ray  
101 image.

102 ***Ethics approval and informed consent:*** The current study was approved by the ethical  
103 medical committee of the hospital. All participants gave informed written consent.

#### 104 ***Statistics Analysis***

105 Statistical analysis was performed with SPSS software (Version 21.0; SPSS Inc., Chicago,  
106 IL). Frequency data were compared by Pearson's chi-square test. For normally distributed  
107 data, independent groups were compared by a Student t-test or one-way analysis of variance  
108 (ANOVA). Where data were not normally distributed, the Mann–Whitney U test or  
109 Kruskal–Wallis H test was adopted. Results were considered significant at  $p < 0.05$ .

#### 110 **Results**

##### 111 ***Gender Ratio and Age at First Diagnosis***

112 The present study included 202 males (79.2%) and 53 females (20.3%), an approximate  
113 gender ratio of 4:1.

114 The median age at first diagnosis was 45.5 years. Approximately 80% of affected patients  
115 were between 21 and 60 years of age (206 cases). The top three age groups represented were

116 41 to 50 years (29%), 21 to 30 years (20.8%), and 31 to 40 years (16.5%).

### 117 *Infection Site*

118 All cases included in the current study were single-site infections. Among them, there were  
119 77 cases of femur infections (30.2%), 66 tibiofibular infections (25.9%), 39 hip joint  
120 infections (15.3%), 16 ankle joint infections (6.3%), 14 humerus infections (5.5%), 14 ulna  
121 and radius infections (5.5%), 10 patella infections (3.9%), eight calcaneus infections (3.1%),  
122 five elbow infections (2.0%), four pelvis infections (1.6%), and two astragalus infections  
123 (0.8%).

### 124 *Classifications*

125 All 255 cases met the Cierny-Mader classification criteria for chronic osteomyelitis (Table 1).  
126 Type IIA (23.1%), type IIIA (20.4%), and type IVA (18.0%), are the most frequent  
127 classifications in the study.

128 **Table S1. Cierny-Mader classification results.**

### 129 *Laboratory Test*

130 The white blood cell count (WBC), ESR, and CRP of 255 patients before operation are  
131 presented in Table 2 below.

132 **Table S2. Laboratory tests of WBC, ESR and CRP.**

### 133 *Comprehensive Statistics*

134 All data on WBC, ESR, and CRP were analyzed. The 255 patients had a total of 323 hospital  
135 admissions and WBC, ESR, and CRP were tested 304 times.



136 ESR and CRP are important indicators of chronic osteomyelitis in laboratory examination. If  
137 both ESR and CRP are abnormal, it is highly indicative of infection. If only CRP is increased,  
138 this may indicate infection. According to the results above, ESR and CRP were abnormal in  
139 71.1% patients. Only 17.4% patients had an abnormal CRP result (Table 3).

140 **Table S3. Comprehensive statistics of WBC, ESR and CRP.**

141 ***Pathogenic Microorganism***

142 Bacterial culture results were classified into g+ bacteria, g- bacteria, or fungus.  
143 245 samples were sent to bacterial culture. According to the result, g+ bacteria (160 times,  
144 65.3%) were overall more common than g- bacteria (83 times, 33.9%). Fungus only  
145 appeared two times (0.8) in the result.

146 In total, 41 types of bacteria were detected. The 13 most frequently detected bacteria are  
147 given in Table 4.

148 **Table S4. Bacterial distribution.**

149 Another 28 bacteria were detected three times or less, including *Klebsiella oxytoca* (3 times  
150 or 1.22%), *Citrobacter braakii* (3 times or 1.22%), *Staphylococcus sciuri* (2 times or 0.82%),  
151 *S. kloosii* (2 times or 0.82%), and *Proteus mirabilis* (2 times or 0.82%). The following  
152 bacteria were detected only once (0.41%): *A. calcoaceticus*-*A. baumannii* complex,  
153 *Achromobacter* spp., *Bacillus* sp., *Burkholderia cepacia*, *Candida parapsilosis*,  
154 *Corynebacterium minutissimum*, *Corynebacterium* sp., *Corynebacterium striatum*,  
155 *Dermatococcus* sp., *Escherichia vulneris*, *Mora staphylococcus*, *Moraxella atlantae*,

156 *Moraxella fulton*, *Mucor* sp., *Proteus* sp., *Pseudomonas putida*, *Serratia marcescens*,

157 *Streptococcus agalactiae*, *Staphylococcus caprae*, *Staphylococcus saprophyticus*,

158 *Staphylococcus warneri*, *Viridans streptococci* and *Weeksella virosa*.

159 Different numbers of samples were sent for detection of bacteria using bacterial cultures.

160 Correlations between the number of samples sent and the detection rate were examined

161 through pairwise comparisons (Table 5). Five samples sent to bacterial culture achieved

162 highest detection rate.

163 **Table S5. Detection rate when using different numbers of samples, and the correlations**  
164 **between detection rate and number of samples.**

### 165 *Identifying Pathogenic Bacteria*

166 According to the results, it is statistically significant between 2 samples and 4 samples, 2

167 samples and 5 samples, 3 samples and 5 samples. Five samples sent for detection has the

168 greatest likelihood of identifying pathogenic bacterial (Table 6).

169 **Table S6. Ability to identify pathogenic bacteria for different numbers of sample, and**  
170 **the correlation between number of samples and identification success.**

### 171 *Sinus Tract*

172 Samples collected from 58 patients with sinus tracts were sent for bacterial culture (Table 7).

173 **Table S7. The distribution of bacteria found in the sinus tract.**

174 We compared the result of sinus tract bacterial culture with the pathogenic bacteria. Only

175 less than half of samples (42.1%) from sinus tract were in consistent with the pathogenic

176 bacteria.

177 **Table S8. The coincidence rate between the result from sinus tract bacterial culture and**  
178 **pathogenic bacteria.**

179 *Two-Stage Debridement and One-Stage Debridement*

180 Two-stage debridement treatment has higher union rate (87.0%) than the one-stage  
181 debridement (71.4%) and the result was statistically significant ( $p < 0.05$ ). In addition,  
182 one-stage debridement has more recurrence than two-stage debridement ( $p < 0.05$ ).

183 **Table S9. Clinical effects and prognosis of the two different treatments.**

184 **Discussion**

185 *Analysis of General Data*

186 *Gender Ratio*

187 Among patients with chronic osteomyelitis, the male:female ratio was 4:1. This is in  
188 accordance with Kremers's report [10], which argued that increasing road and industrial  
189 accidents contributed to the greater number of male patients, since males are more likely to  
190 engage in heavy physical labor or high risk activities.

191 *Age Distribution*

192 The current study showed chronic osteomyelitis was highest in the age group of 41 to 50  
193 year-olds (29.0%), probably because road accidents frequently occur among those aged  
194 20-50 years [11]. Traffic trauma is a high energy trauma that often leads to an open wound, a  
195 potential pathogenic factor for traumatic osteomyelitis. In addition, this age group has a high  
196 incidence of diabetes, which increases the frequency of diabetes-related osteomyelitis.

197 Kremers [10] reports that American patients with diabetes-related osteomyelitis have  
198 increased from 2.3/100,000 in the late 1970s, to 10.5/100,000 in the 1990s, although  
199 currently its incidence appears to be stable at approximately 7.6/100,000. According to  
200 Cierny et al. [12], immunity of an organism is a significant factor in the occurrence and  
201 transformation of osteomyelitis. Different age groups have different resistance to infection,  
202 and older individuals may be more likely to have osteomyelitis because they have weaker  
203 immune systems.

#### 204 *Analysis of Disease Data*

##### 205 *Infection Site*

206 The top three infection sites of chronic osteomyelitis - the femur (30.2%), tibiofibular  
207 (25.9%) and hip joint (15.3%) – account for 71.4% of all infections. This is consistent with  
208 other clinical reports [13,14], but differs from the clinical reports of south China. Wang et al.  
209 [8] reports that in southwest China, the top two infection sites are tibia (57.5%) and femur  
210 (26.8%). Jiang et al. [9] reported a similar result for southern China, finding the most  
211 frequent single infection site was the tibia (39.00%), followed by the femur (24.46%), and  
212 calcaneus (11.46%). One possible reason for this difference between north and south China  
213 could be the dense population found in southern China, leading to more frequent road and  
214 industrial accidents. As noted above, such accidents are more likely to create trauma with an  
215 open wound, and the thin soft tissue surrounding the tibia and lack of blood supply can

216 increase the likelihood of wound infection, followed by chronic osteomyelitis. Thus, tibia  
217 osteomyelitis has the highest incidence in the north China.

### 218 *Cierny-Mader Classification*

219 The top three classifications in the current study are type IIA (23.1%), type IIIA (20.4%), and  
220 type IVA (18.0%), accounting for 61.5% of cases in total. In the domestic literature, the  
221 Cierny-Mader classification information given is often insufficient, with only anatomical  
222 type staging provided and no classification of the physiological type of the host [15]. In  
223 foreign literature using the Cierny-Mader classification, different literature focuses on  
224 different case groups, and the results also differ from each other. Hence, there is no uniform  
225 consensus on the statistical distribution of *Cierny-Mader* types [16-18].

226 Cierny et al. [12] discussed osteomyelitis classification in detail. They held the view that  
227 osteomyelitis classifications are not fixed for a particular case, but rather that osteomyelitis  
228 may transform from one classification to another in the same patient, as a process of natural  
229 progression or treatment. Thus, different types of osteomyelitis can be thought of as different  
230 pathological/physiological stages of disease [12]. The current study suggests that most  
231 chronic osteomyelitis falls into types II, III, and IV. For the physiological class, host A is  
232 more common than host B, and host C type is seen only rarely.

### 233 *Bacterial Culture*

234 The results of debridement bacterial cultures indicate that g+ bacteria (65.3%) was more

235 common than g- bacteria (33.9%). The five most commonly observed bacteria were  
236 *Staphylococcus aureus* (35.51%), *S. epidermidis* (14.29%), *Pseudomonas aeruginosa* (9.8%),  
237 *Enterobacter cloacae* (5.31%), and *Escherichia coli* (4.08%); these accounted for 69.0% of  
238 the infections observed. The two g+ *Staphylococcus* bacteria made up nearly 50% of  
239 infections. The remaining three of the most five common bacteria were all g- bacteria. This is  
240 similar to most results found in clinical reports in China and abroad [8, 9, 19, 20, 21].

#### 241 *Detection Rate for Different Numbers of Samples*

242 Identifying the pathogenic bacteria involved is an important step in treating chronic  
243 osteomyelitis. Based on characteristics of the pathogenic bacteria, effective antibiotics  
244 specific to the bacteria found should be used in clinical practice; this is a precondition to  
245 guaranteeing a curative effect. Sending more samples at once was an effective method to  
246 improve the detection rate of pathogenic bacteria. Lew et al. [22] suggested that five samples  
247 or more should be sent when treating chronic osteomyelitis, and that this could significantly  
248 improve the microbial detection rate. Our study similarly showed that the more sample sent  
249 for bacterial culture, the higher the detection rate. Sending only one sample had the lowest  
250 detection rate (66.7%), while five samples gave the highest rate (90.6%). Therefore, five or  
251 more samples should be sent from debridement to improve detection rates.

#### 252 *Identifying Pathogenic Bacteria*

253 Typically, pathogenic bacteria and contamination bacteria are both observed in the results

254 from bacterial cultures. If the same bacteria is detected twice or more in the culture results, it  
255 is presumed to be the pathogenic bacteria [23]. Using this principle, contaminant bacteria can  
256 be distinguished from pathogenic bacteria in the results. If all cultures give negative results,  
257 or if only one or differing results are observed among samples, then pathogenic bacteria  
258 cannot be determined. The current study indicates that the more samples that are sent for  
259 examination, the higher the probability of identifying the pathogenic bacteria. The  
260 probability of identifying the pathogenic bacteria was significantly improved (82.5%) if five  
261 or more samples were sent for bacterial culture; this is higher than the rates reported from  
262 Wang (71.5%) and Kremers et al. (75%).

### 263 *Bacterial Culture of Sinus Tract Sample*

264 In the current study, results from sinus tract bacterial culture were consistent with pathogenic  
265 bacteria in only 42.1% of cases. This might be caused by contamination with nonpathogenic  
266 bacteria during the sampling process, or other naturally-occurring random factors [8, 24].  
267 Clinicians may also be collecting these samples in a non-standard manner. Regardless, the  
268 results from sinus tract bacterial culture can only be used as a reference for finding  
269 antibiotics to which bacteria are susceptible, not as the basis of the diagnosis and treatment  
270 decision.

### 271 *Clinical Treatments*

272 In treating chronic osteomyelitis, the patient's overall condition and local lesion must be

273 considered to accurately assess the patient's state before making careful decisions regarding  
274 treatment. The published literature includes a number of clinical treatments for chronic  
275 osteomyelitis [25-28], such as radical debridement, bone transport, acute limb shortening,  
276 two-staged reconstruction, local antibiotic therapy (antibiotic-impregnated beads, spacers,  
277 cements, intramedullary nails) and soft tissue grafting (free flap, myocutaneous flap, skin  
278 graft). Nonetheless, a common standard of diagnosis and treatment has not been established.  
279 Two basic consensuses are present regarding the treatment of chronic osteomyelitis. The first  
280 is that debridement is key to all treatments. The second is that guaranteeing a curative effect  
281 requires identifying the pathogenic bacteria involved and the use of appropriate antibiotics.  
282 The site of bone defect should be treated with local antibiotic-loaded PMMA spacers.  
283 External fixation or internal fixation can stabilize fracture ends.  
284 Cierny [29] and Forsberg et al. [30] repeatedly emphasize radical debridement as the  
285 foundation for treating chronic osteomyelitis. A thorough scrape is needed at the dead space,  
286 necrotic tissue and sinus tract, until fresh blood is exuded, indicating healthy tissue, and  
287 plenty of irrigation must be done. Results of the current study suggest a good curative effect  
288 (87%) is achieved by repeated radical debridement, and implantation of appropriate  
289 antibiotic bone cement beads in the local lesion, with external or internal fixation. The  
290 reasons are as follow. 1) In the two-stage debridement method, debridement is completed in  
291 a more thorough manner. Within one week, debridement is performed twice. The second



292 debridement removes all possible contaminated tissues based on the first debridement, thus  
293 reducing the possibility of recurrence [22,31-32]. 2) Sending five samples for bacterial  
294 culture in the first debridement improves the detection rate of pathogenic bacterial. Further,  
295 an appropriate (i.e., one the bacteria was susceptible to) antibiotic release-carrier can be  
296 identified; it is more successful to use antibiotics based on the results of the bacterial culture  
297 and susceptibility testing. This also ensures rare bacteria are quickly recognized, and reduces  
298 the side effects of antibiotics since targeted antibiotics are used [33]. 3) An appropriate  
299 antibiotic release-carrier implanted after one week maintains the effective blood  
300 concentration of the antibiotic in local tissue longer. Previous research has shown that, after  
301 the blood antibiotic concentration reached its peak, it would gradually decline, so that after a  
302 few weeks, local antibiotic blood concentration was less than the effective blood  
303 concentration [34, 35]. Therefore, implanting a second, targeted antibiotic release carrier  
304 after one week could extend the duration of the local blood concentration, thus better  
305 inhibiting the growth of pathogenic bacteria. The method of repeating radical debridement  
306 and local antibiotic-loaded PMMA spacers ± external fixation gave good clinical results and  
307 can be recommended. One drawback of this approach is that it increases the number of  
308 operations required and prolongs hospitalization, thus increasing expenses.

309 The present study had several limitations. Since it was conducted in a single medical center  
310 in north China, it may not characterize chronic osteomyelitis in the whole area. Therefore,

311 multicenter studies should be performed to obtain more detailed data. Second, this study  
312 lacked detailed statistical data on oral antibiotic therapy because most patients received oral  
313 antibiotics out of hospital.

#### 314 **Conclusions**

315 In summary, our study showed that chronic osteomyelitis is more common in males and in  
316 the age group from 41-50 years of age. Common infection sites are the femur, tibiofibular,  
317 and hip joint. Using Cierny-Mader classification, type IIA, IIIA and IVA infections were  
318 most common. More g+ than g- bacterial infections were observed, with *S. aureus* the most  
319 commonly observed pathogenic organism.

320 To improve pathogen detection rate, five or more samples should be sent for bacterial culture.

321 Bacterial culture of the sinus tract performed poorly in identifying pathogenic bacteria, so  
322 choosing the appropriate antibiotic based on the result of sinus tract bacteria is not advised.

323 Repeated radical debridement and identification of pathogenic bacteria are keys to successful  
324 treatment of chronic osteomyelitis. The current study suggests a treatment of two stage  
325 debridement + antibiotic-loaded PMMA spacers ± external fixation is the most effective.

326

327 **Acknowledgment**

328 This research received no specific grant from any funding agency in the public, commercial,  
329 or not-for-profit sectors. There is no conflict of interests in the current research.

330 **References**

- 331 [1] Wirbel, R., and K. Hermans. 2014. Surgical treatment of chronic osteomyelitis in children  
332 admitted from developing countries. *African Journal of Paediatric Surgery* 11:297.
- 333 [2] Geurts, J., A. Hohnen, T. Vranken, and P. Moh. 2017. Treatment strategies for chronic  
334 osteomyelitis in low- and middle-income countries: systematic review. *Tropical Medicine &*  
335 *International Health* 22:1054-1062.
- 336 [3] Islam, G., J. Tomlinson, T. Darton, and R. Townsend. 2013. Bone and joint infections.  
337 *Surgery* 4:187-192.
- 338 [4] J. G. Penn-Barwell, P. M. Bennett, C. A. Fries, J. M. Kendrew, M. J. Midwinter, and R. F.  
339 Rickard. 2013. Severe open tibial fractures in combat trauma: management and preliminary  
340 outcomes. *The Bone & Joint Journal* 95-B:101-105.
- 341 [5] Zimmerli, W. 2014. Clinical presentation and treatment of orthopaedic implant-associated  
342 infection. *Journal of Internal Medicine* 276:111-119.
- 343 [6] Sagray, B. A., S. Malhotra, and J. S. Steinberg. 2014. Current therapies for diabetic foot  
344 infections and osteomyelitis. *Clinics in Podiatric Medicine and Surgery* 31:57-70.
- 345 [7] Junlin, Z., L. Yihan, Q. Wang, A. N. Pollak, and G. P. Slobogean. 2014. Status of road  
346 safety and injury burden: China. *J Orthop Trauma*:S41-S42.
- 347 [8] Wang, X., S. Yu, D. Sun, J. Fu, S. Wang, K. Huang, and Z. Xie. 2017. Current data on  
348 extremities chronic osteomyelitis in southwest China: epidemiology, microbiology and

- 349 therapeutic consequences. *Scientific Reports* 7.
- 350 [9] Jiang, N., Y. Ma, Y. Jiang, X. Zhao, G. Xie, Y. Hu, C. Qin, and B. Yu. 2015. Clinical  
351 characteristics and treatment of extremity chronic osteomyelitis in southern China. *Medicine*  
352 94:e1874.
- 353 [10] Kremers, H. M., M. E. Nwojo, J. E. Ransom, C. M. Wood-Wentz, L. J. Melton, and P.  
354 M. Huddleston. 2015. Trends in the epidemiology of osteomyelitis. *The Journal of Bone and*  
355 *Joint Surgery* 97:837-845.
- 356 [11] Bucholz, R. W., J. D. Heckman, and C. Court-Brown. 2006. *Rockwood & Greens*  
357 *Fracture in Adults*. 6 Edition., vol. 18.484 - 499.
- 358 [12] III, G. C., J. T. Mader, and J. J. Penninck. 2003. A clinical staging system for adult  
359 osteomyelitis. *Clinical Orthopaedics and Related Research* 414:7-24.
- 360 [13] Zhao, G., Qi. M., Zhang. B.S., and Huang.L. 2012. Staged treatment strategy for  
361 chronic osteomyelitis. *Chinese Journal of Bone and Joint Surgery* 5:416-419.
- 362 [14] Hwang, H., W. Jeong, D. Lee, and S. Lee. 2016. Acute primary hematogenous  
363 osteomyelitis in the epiphysis of the distal tibia: A case report with review of the literature.  
364 *The Journal of Foot and Ankle Surgery* 55:600-604.
- 365 [15] Xu, Y.Q., Zhu.Y.L., Fan. X.Y., Tang. H., Wang. Y., He. X.Q., Li. J., Ding.J., and Li. Y.  
366 2014. Treatment of osteomyelitis following surgery of open tibial fracture with vancomycin  
367 calcium sulphate or vancomycin cement. *Chinese Journal of Orthopaedic Trauma*

- 368 11:925-929.
- 369 [16] Bose, D., R. Kugan, D. Stubbs, and M. McNally. 2015. Management of infected  
370 nonunion of the long bones by a multidisciplinary team. *The Bone & Joint Journal*:814-817
- 371 [17] Romanò, C. L., D. Romanò, N. Logoluso, and L. Drago. 2011. Bone and joint infections  
372 in adults: a comprehensive classification proposal. *European Orthopaedics and Traumatology*  
373 1:207-217.
- 374 [18] JR, J. W. M., J. B. Jupite, A. J. Weiland, and H. S. Byrd. 1989. Current concepts review  
375 clinical classification of post-traumatic tibial osteomyelitis. *The Journal of Bone and Joint*  
376 *Surgery* 71-A:1422-1428.
- 377 [19] Ceroni, D., C. Grumetz, O. Desvachez, S. Pusateri, P. Dunand, and E. Samara. 2016.  
378 From prevention of pin-tract infection to treatment of osteomyelitis during paediatric  
379 external fixation. *Journal of Children's Orthopaedics* 10:605-612.
- 380 [20] Vuong, C., and M. Otto. 2002. Staphylococcus epidermidis infections. *Microbes and*  
381 *Infection* 4:481-489.
- 382 [21] Vieira, G. D., H. R. Mendonca, T. C. Alves, D. F. Araujo, F. M. Silveira, A. P. Freitas, F.  
383 Bressan, R. F. Radaeli, and C. M. Sousa. 2015. Survey of infection in orthopedic  
384 postoperative and their causative agents: a prospective study. *Rev Assoc Med Bras* (1992)  
385 61:341-6.
- 386 [22] Lew, D. P., and F. A. Waldvogel. 2004. Osteomyelitis. *Lancet* 364:369–79.

- 387 [23] Parvizi, J., B. Zmistowski, E. F. Berbari, T. W. Baue, B. D. Springer, C. J. D. Valle, K. L.  
388 Garvin, M. D. Wongworawa, C. G. Zalavras, T. K. Fehring, D. R. Osmon, M. A. Mont, R. L.  
389 Barrack, K. R. Berend, J. L. Esterhai, T. J. Gioe, S. M. Kurtz, B. A. Masri, A. D. Nana, M. J.  
390 Spangehl, and J. Segreti. 2011. New definition for periprosthetic joint infection:the  
391 workgroup convened by the musculoskeletal infection society. *The Journal of Arthroplasty*  
392 26:1136-1138.
- 393 [24] Mackowiak, P. A., S. R. Jones, and J. W. Smith. 1978. Diagnostic value of sinus-tract  
394 cultures in chronic osteomyelitis. *JAMA* 239:2772-75
- 395 [25] Zalavras, C. G., T. Christensen, N. Rigopoulos, P. Holtom, and M. J. Patzakis. 2009.  
396 Infection following operative treatment of ankle fractures. *Clinical Orthopaedics and Related*  
397 *Research*® 467:1715-1720.
- 398 [26] Pederson, W. C., and D. W. Person. 2007. Long bone reconstruction with vascularized  
399 bone grafts. *Orthopedic Clinics of North America* 38:23-35.
- 400 [27] Masquelet, A. C., and T. Begue. 2010. The concept of induced membrane for  
401 reconstruction of long bone defects. *Orthopedic Clinics of North America* 41:27-37.
- 402 [28] Patzakis, M. J., and C. G. Zalavras. 2005. Chronic posttraumatic osteomyelitis and  
403 infected nonunion of the tibia: Current management concepts. *Journal of the American*  
404 *Academy of Orthopaedic Surgeons* 13:417-27.
- 405 [29] Cierny, G. 2011. Surgical treatment of osteomyelitis. *Plastic and Reconstructive Surgery*

406 127:190S-204S.

407 [30]Forsberg, J. A., M. B. K. Potter, G. C. III, and L. Webb. 2011. Diagnosis and  
408 management of chronic infection. *Journal of the American Academy of Orthopaedic*  
409 *Surgeons* 19:S9-S19.

410 [31] III, G. C., J. T. Mader, and J. J. Penninck. 2003. A clinical staging system for adult  
411 osteomyelitis. *Clinical Orthopaedics and Related Research* 414:7-24.

412 [32] Simpson, A. H. R. W., M. Deakin, and J. M. Latham. 2001. Chronic osteomyelitis: the  
413 effect of the extent of surgical resection on infection-free survival. *The Journal of Bone and*  
414 *Joint Surgery* 83-B:403-407.

415 [33] Luo, S., T. Jiang, Y. Yang, X. Yang, and J. Zhao. 2016. Combination therapy with  
416 vancomycin-loaded calcium sulfate and vancomycin-loaded PMMA in the treatment of  
417 chronic osteomyelitis. *BMC Musculoskeletal Disorders* 17.

418 [34]Stallmann, H. P., C. Faber, A. L. Bronckers, A. V. N. Amerongen, and P. I. Wuisman.  
419 2006. In vitro gentamicin release from commercially available calcium-phosphate bone  
420 substitutes influence of carrier type on duration of the release profile. *Bmc Musculoskeletal*  
421 *Disorders* 7:18.

422 [35] Zalavras, C. G., M. J. Patzakis, and P. Holtom. 2004. Local antibiotic therapy in the  
423 treatment of open fractures and osteomyelitis. *Clinical Orthopaedics and Related Research*  
424 427:86-93.



425 **Table Headers**

426 **Table S1. Cierny-Mader classification results.**

427 **Table S2. Laboratory tests of WBC, ESR and CRP.**

428 **Table S3. Comprehensive statistics of WBC, ESR and CRP.**

429 **Table S4. Bacterial distribution.**

430 **Table S5. Detection rate when using different numbers of samples, and the correlations**  
431 **between detection rate and number of samples.**

432 **Table S6. Ability to identify pathogenic bacteria for different numbers of sample, and**  
433 **the correlation between number of samples and identification success.**

434 **Table S7. The distribution of bacteria found in the sinus tract.**

435 **Table S8. The coincidence rate between the result from sinus tract bacterial culture and**  
436 **pathogenic bacteria.**

437 **Table S9. Clinical effects and prognosis of the two different treatments.**



**Table S1. Cierny-Mader classification results.**

|          |                 | Host A | Host BL | Host BS | Host BL+BS | Host C |
|----------|-----------------|--------|---------|---------|------------|--------|
| Type I   | Cases           | 10     | 2       | 1       | 0          | 0      |
|          | Percentage      | 3.9%   | 0.8%    | 0.4%    | 0.0%       | 0.0%   |
| Type II  | Cases           | 59     | 13      | 17      | 8          | 0      |
|          | Percentage      | 23.1%  | 5.1%    | 6.7%    | 3.1%       | 0.0%   |
| Type III | Cases           | 52     | 10      | 8       | 5          | 0      |
|          | Percentage      | 20.4%  | 3.9%    | 3.1%    | 2.0%       | 0.0%   |
| Type V   | Cases           | 46     | 17      | 4       | 3          | 0      |
|          | I<br>Percentage | 18.0%  | 6.7%    | 1.6%    | 1.2%       | 0.0%   |

**Table S2. Laboratory tests of WBC, ESR and CRP.**

|        | Frequency | Percentage |
|--------|-----------|------------|
| WBC(+) | 104       | 32.2%      |
| WBC(-) | 219       | 67.8%      |
| ESR(+) | 230       | 71.2%      |
| ESR(-) | 93        | 28.8%      |
| CRP(+) | 290       | 89.7%      |
| CRP(-) | 83        | 10.3%      |

**Table S3. Comprehensive statistics of WBC, ESR and CRP.**

|          | WBC | ESR | CRP | Times | Percentage |
|----------|-----|-----|-----|-------|------------|
| Result 1 | (-) | (-) | (-) | 20    | 6.6%       |
| Result 2 | (+) | (-) | (-) | 3     | 1.0%       |
| Result 3 | (-) | (+) | (-) | 2     | 0.7%       |
| Result 4 | (-) | (-) | (+) | 53    | 17.4%      |
| Result 5 | (+) | (+) | (-) | 0     | 0.0%       |
| Result 6 | (+) | (-) | (+) | 8     | 2.6%       |
| Result 7 | (-) | (+) | (+) | 132   | 43.4%      |
| Result 8 | (+) | (+) | (+) | 86    | 28.3%      |
| In total |     |     |     | 304   | 100.0%     |

**Table S4. Bacterial distribution.**

| Bacterial                        | Frequency | Percentage |
|----------------------------------|-----------|------------|
| Staphylococcus aureus            | 87        | 35.51%     |
| Staphylococcus epidermidis       | 35        | 14.29%     |
| Pseudomonas aeruginosa           | 24        | 9.80%      |
| Enterobacter cloacae             | 13        | 5.31%      |
| Escherichia coli                 | 11        | 4.49%      |
| Klebsiella pneumoniae            | 7         | 2.86%      |
| Staphylococcus capitis           | 6         | 2.45%      |
| Baumann's acinetobacter complex. | 6         | 2.45%      |
| Enterococcus faecalis            | 5         | 2.04%      |
| Staphylococcus haemolyticus      | 4         | 1.63%      |
| Enterococcus faecium             | 4         | 1.63%      |
| Staphylococcus hominis           | 4         | 1.63%      |
| Serratia marcescens              | 4         | 1.63%      |
| Others                           |           | 14.28%     |

**Table S5. Detection rate when using different numbers of samples, and the correlations between detection rate and number of samples.**

| Number of samples for detection | Detection times | Negative result | Positive result | Detection rate | Compare with other groups | P Value |
|---------------------------------|-----------------|-----------------|-----------------|----------------|---------------------------|---------|
| 1 sample                        | 63              | 21              | 42              | 66.7%          | VS 2 sample               | >0.05   |
|                                 |                 |                 |                 |                | VS 3 samples              | >0.05   |
|                                 |                 |                 |                 |                | VS 4 samples              | >0.05   |
|                                 |                 |                 |                 |                | VS 5 samples              | <0.05   |
| 2 samples                       | 76              | 23              | 53              | 69.7%          | VS 3 samples              | >0.05   |
|                                 |                 |                 |                 |                | VS 4 samples              | >0.05   |
|                                 |                 |                 |                 |                | VS 5 samples              | <0.05   |
| 3 samples                       | 51              | 13              | 38              | 74.5%          | VS 4 samples              | >0.05   |
|                                 |                 |                 |                 |                | VS 5 samples              | <0.05   |
| 4 samples                       | 41              | 9               | 32              | 78.0%          | VS 5 samples              | >0.05   |
| 5 samples or above              | 64              | 6               | 58              | 90.6%          |                           |         |

**Table S6. Ability to identify pathogenic bacteria for different numbers of sample, and the correlation between number of samples and identification success.**

| Sample              | Times of detection | Identifying pathogenic bacteria | Fail to identify pathogenic bacteria | Percentage of identifying pathogenic bacteria |
|---------------------|--------------------|---------------------------------|--------------------------------------|-----------------------------------------------|
| 2 samples           | 76                 | 32                              | 44                                   | 42.1%                                         |
| 3 samples           | 52                 | 27                              | 25                                   | 51.9%                                         |
| 4 samples           | 41                 | 28                              | 13                                   | 68.3%                                         |
| 5 samples and above | 64                 | 53                              | 11                                   | 82.8%                                         |

  

|                        | P Value |
|------------------------|---------|
| 2 samples VS 3 samples | >0.05   |
| 2 samples VS 4 samples | <0.05   |
| 2 samples VS 5 samples | <0.05   |
| 3 samples VS 4 samples | >0.05   |
| 3 samples VS 5 samples | <0.05   |
| 4 samples VS 5 samples | >0.05   |



**Table S7. The distribution of bacteria found in the sinus tract.**

| Bacteria                            | Frequency | percentage |
|-------------------------------------|-----------|------------|
| staphylococcus aureus               | 15        | 25.86%     |
| staphylococcus epidermidis          | 9         | 15.52%     |
| pseudomonas aeruginosa              | 5         | 8.62%      |
| enterobacter cloacae                | 3         | 5.17%      |
| escherichia coli                    | 3         | 5.17%      |
| staphylococcus haemolyticus         | 2         | 3.45%      |
| enterococcus faecalis               | 2         | 3.45%      |
| klebsiella pneumoniae               | 2         | 3.45%      |
| Baumann's acinetobacter<br>complex. | 2         | 3.45%      |
| Candida albicans                    | 2         | 3.45%      |
| Rhodococcus rhodococcus             | 2         | 3.45%      |
| peptostreptococcus anaerobius       | 2         | 3.45%      |
| staphylococcus warneri              | 1         | 1.72%      |
| Enterobacter agglomerans            | 1         | 1.72%      |
| enterobacter                        | 1         | 1.72%      |
| providencia rettgeri                | 1         | 1.72%      |
| staphylococcus hominis              | 1         | 1.72%      |
| citrobacter braakii                 | 1         | 1.72%      |
| staphylococcus saprophyticus        | 1         | 1.72%      |

|                    |    |        |
|--------------------|----|--------|
| proteus mirabilis  | 1  | 1.72%  |
| klebsiella oxytoca | 1  | 1.72%  |
| In total           | 58 | 100.0% |

---

**Table S8. The coincidence rate between the result from sinus tract bacterial culture and pathogenic bacteria.**

|                                    | Numbers | Percentage |
|------------------------------------|---------|------------|
| Total Positive samples             | 57      | 100.0%     |
| Same with pathogenic bacteria      | 24      | 42.1%      |
| Different with pathogenic bacteria | 33      | 57.9%      |

**Table S9. Clinical effects and prognosis of the two different treatments.**

| Treatment                                  | Two-stage<br>(108cases) | one-stage<br>(147cases) | P-value |
|--------------------------------------------|-------------------------|-------------------------|---------|
| union                                      | 94                      | 105                     | <0.05   |
| Recurrence                                 | 14                      | 42                      | <0.05   |
| Union rate after first treatment           | 87.0%                   | 71.4%                   | <0.05   |
| Continue the treatment after<br>Recurrence | 11                      | 30                      | >0.05   |
| Union after once retreatment               | 9                       | 4                       | <0.05   |
| Union after twice retreatments             | 0                       | 13                      | -       |
| Union after thrice treatments              | 0                       | 12                      | -       |
| Withdraw treatment after<br>Recurrence     | 3                       | 6                       | >0.05   |
| Nonunion(amputation)                       | 2                       | 1                       | >0.05   |
